# Supplementary material
Source: Springer Nature journal article supplement (https://www.springermedizin.de/resource/supplementary/12889_2007_1234_MOESM1_ESM.pdf/9502750)

Cases per 100,000 workers

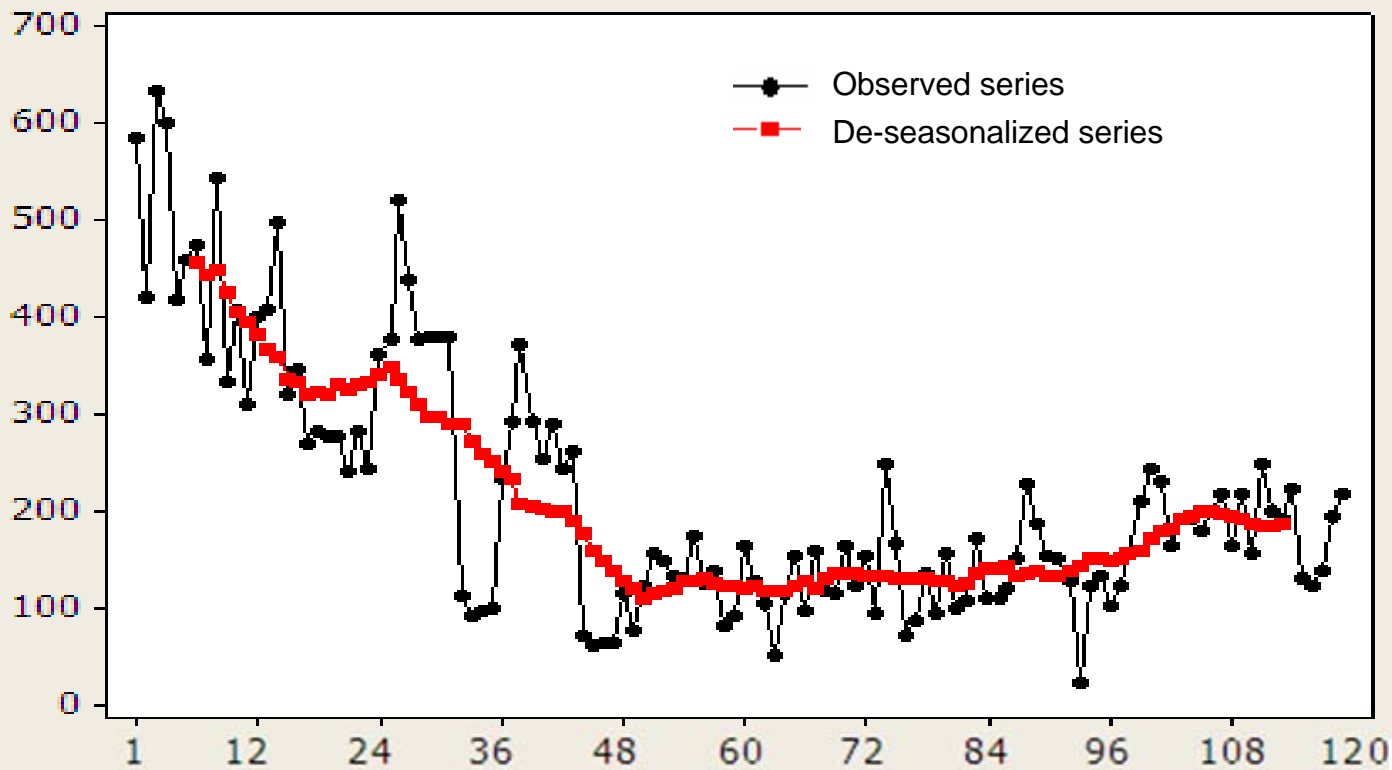

Months since 1997

Supplement: MOESM1 [file 9502750]
